# Supplementary material
Source: PubMed Central journal article supplement (PMC3485703)
Supplement: AEM.01241-12_zam999103771so1.pdf [file AEM.01241-12_zam999103771so1.pdf]

Figure S1

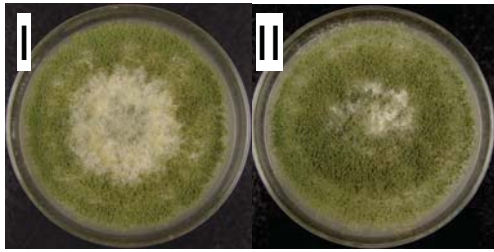

Two types of colony morphology on PDA

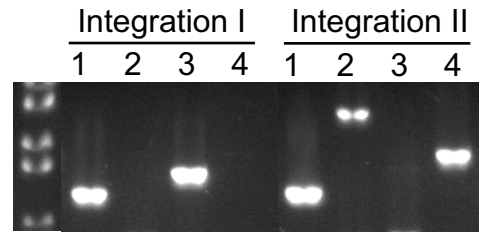

PCR analyses of integration sites

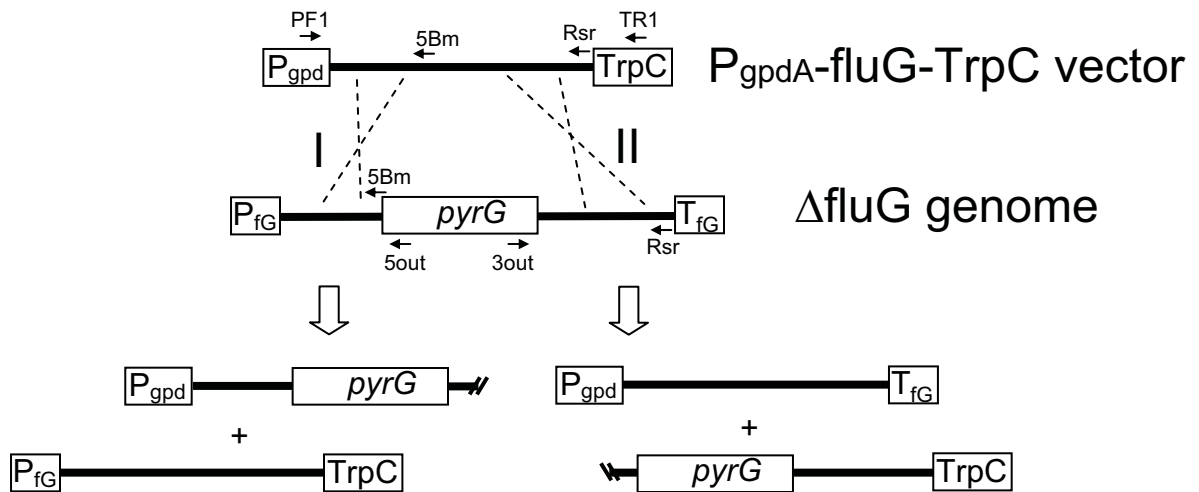

Schematic representation of the two types of integration

| Primer pair     | Integration I | Integration II |
|-----------------|---------------|----------------|
| 1. PF1/5Bm      | Y             | Y              |
| 2. PF1/Rsr      | N             | Y              |
| 3. PF1/pyrG5out | Y             | N              |
| 4. pyrG3out/TR1 | N             | Y              |
