# Supplementary material
Source: PubMed Central journal article supplement (PMC3485703)
Supplement: AEM.01241-12_zam999103771so2.pdf [file AEM.01241-12_zam999103771so2.pdf]

Figure S2 Alignment of FluG amino acid sequences of four aspergilli. The sequences used are *A. flavus* (ADY69103 and EED46528), *A. oryzae* (BAE63436), *A. nidulans* (AAC37414), and *A. fumigatus* (EAL92854 and EDP53020).

```

A. flavus      ---MDLTSLSLSLIQTHPLIDNHAHNLLKRDEACNYAKYPFEQITSEAQGSALGNATSTLP
A. oryzae     ---MDLTSLSLSLIQTHPLIDNHAHNLLKRDEACNYAKYPFEQITSEAQGSALGNATSTLP
A. nidulans   --MATLSSLRHLIQTHPLIDNHAHNLLSQAACKYAKYPFEQIISEAQGVLANAPSTLS
A. fumigatus  MDNDTLDLSRHLIQCHPLIDNHAHNILDKASACNYAKYPFEQITSEAQGVLANATSTLP
                * * * . * * * . * * * * * * * * * . * . * * * * * * * * * * * * * * *

A. flavus      LHRAATQLAALYRCASSDWDHVKAARDAWVQRDYDGLIRECLQGTHTLLLDDLLTDQDIE
A. oryzae     LHRAATQLAALYRCASSDWDHVKAARDAWVQRDYDGLIRECLQGTHTLLLDDLLTDQDIE
A. nidulans   FHRAASQLATLYQSSSSDWDVRAARDQSVQRDYEGLIRKCLEGTQVLLLDDLLTENDVE
A. fumigatus  LHRAASQLAVLYDCPSSDWEQVKAARQKWVERDYDGLVRQCLQGTHTLLLDDLLADQDIE
                * * * * . * * * * * * . * * * * * . * * * * * * * * * * * * * *

A. flavus      SYEWHDRFTTSQTKRIVRIEILAAETISTLMRDDARPQEG-DVSVLRERWEQFREGFKQR
A. oryzae     SYEWHDRFTTSQTKRIVRIEILAAETISTLMRDDARPQEG-DVSVLRERWEQFREGFKQR
A. nidulans   LFDWHRDFTASATKRIVRIEALAASVLSQIVHGGPVPQDSSDLSAFQTLWESFSRNFSAL
A. fumigatus  PYQWHDQFTVSATKRIVRIEALAARMLATVMRGSSILEAG-DVSALESRFLAFRDGFSRL
                . * * * . * * * * * * * * * * * * . . . . . * . * * * * *

A. flavus      IAETADPAVVGFKSVICYRTGLNVQPIEDSDTLLLESFGRTVGGQGSAYRVEDKRLN
A. oryzae     IAETADPAVVGFKSVICYRTGLNVQPIEDSDTLLLESFGRTVGGQGSAYRVEDKRLN
A. nidulans   VSDAIADPAVVGFKSVICYRTGLDVQPTDDRDTERLIRSFARTISQAAVSTPRVEDKPLN
A. fumigatus  VSEAIEDPAVVGFKSVICYRTGLNVQPT-DEDAGVLLQSFARTIRTS-EAGYRVEDKPLN
                . . . * * * * * * * * * * * * * * * * * * * * * * * * * * *

A. flavus      DWVVRQTLNLLQSAKAATASAPNKPLQLHTGLGDNDIDLVLNPAHLQSLIAQYPEVDFV
A. oryzae     DWVVRQTLNLLQSAKAATASAPNKPLQLHTGLGDNDIDLVLNPAHLQSLIAQYPEVDFV
A. nidulans   DWLVRQTLNLLKAQKVTQ---PNKPLQLHTGLGDNDINLLKSNPAHLQSLIAQYPEVDFV
A. fumigatus  DWLVRQTLDLLQASKSSKCKNKPLQLHTGLGDNDISLVLNPAHLQSLIAQYPEVDFV
                * * . * * * * * * * * * * * * * * * * * * * * * * * * * * *

A. flavus      LLHSSYPYTREAGYLACVYPNVYLDLGEVFPMVSRDAQESILRDSLDIVPTTRLLWSTDG
A. oryzae     LLHSSYPYTREAGYLACVYPNVYLDLGEVFPMVSRDAQESILRDSLDIVPTTRLLWSTDG
A. nidulans   LLHSSYPYTREAGYLACVYPNVYLDLGEVFPMVSRDAQESILRESLEIVPSTRLLWSTDG
A. fumigatus  LLHSSYPYTREAGYLACVYPNVYLDLGEVFPMVSRDAEESIIRDSLDIVPTKRLWSTDG
                * * * * * * * * * * * * * * * * * * * * * * * * * * * * * *

A. flavus      HFFPETFYLANQFRDVMKVFVDYVHGHGDFTVDAQAAADILFHNSNRAYSLENEKLAY
A. oryzae     HFFPETFYLANQFRDVMKVFVDYVHYGHGDFTVDAQAAADILFHNSNRAYSLENEKLAY
A. nidulans   HFFPETFWLANRQFRDALEKVFVDYVQNGDYTIEQAMQAAADILFHNSNRLYELNEQPPS
A. fumigatus  HFFPETFYLGKQFR----DVFVDYVRQGDWTVTQAKEAAADILFHNSNRLYDLNEQPSF
                * * * * * * * * * * * * * * * * * * * * * * * * * * *

A. flavus      EAPVSANS--VSASSTATLDAFMRGNPDVKYIWMQFIDYTNTTTRVRMFPVAEFAKIARKQ
A. oryzae     EAPVSANS--VSASSTATLDAFMRGNPDVKYIWMQFIDYTNTTTRVRMFPVAEFAKIARKQ
A. nidulans   AALSSGHQTVSRISSDLDLEKFIIRSNPGVKYVWTQFIDYTATVRVRMFPVMEFAKIVRKQ
A. fumigatus  DQISKP----ITISSTHTLETFMRCNPDVKYVWMQVVDYTATTRLRIFPILEFAKIVRKQ
                * * * * * * * * * * * * * * * * * * * * * * * * * * *

A. flavus      RRVGICLCTQLMLQDDSIAPGVSVTGQFYMEPDLSSLRRNVGIDSKSATVMTYWKTEEGA
A. oryzae     RRVGICLCTQLMLQDDSIAPGVSVTGQFYMEPDLSSLRRNVGIDSKSATVMTYWKTEEGA
A. nidulans   RRLGISMATFWMLQDDEVVG-GSTTGQFYLIPLDSTLSPNVGIDSKSATVMTWVKSEQGE
A. fumigatus  RRIGISLCVFWMLQDDSMTEGTTTGQFYMEPDLTSLSPNVGLGSKSATVMTFWRSEENK
                * * . * * * * * * * * * * * * * * * * * * * * * * * * *
    
```

A. *flavus* PLPGCPRTTLQRVTNNLR-EHGIEVTCGFEIEVILLKPITN-DAGETDYVPVVRNHSWSQ  
A. *oryzae* PLPGCPRTTLQRVTNNLR-EHGIEVTCGFEIEVILLKPITN-DAGETDYVPVVRNHSWSQ  
A. *nidulans* SLEECPRTNLLNINNKLKDEFGIQATCGFEIEVVFLKPTTDPSTGEEDWAPSVTNHSWSQ  
A. *fumigatus* PLEGCPRTALQNIVDKLHTDHGIAVTCGFEIEVIFLRPDTDPSTGETRYLPAVTNHSWSQ  
\* \*\*\*\* \* . \* . \*\* \*\*\*\*\* . \* \* \* . \*\* \* \* \*\*\*\*\*

A. *flavus* MTSDDRKMVPLLEEIVEALASIGIHLEQFHAESAPGQFEFIFLPPGSPIATVDTLIKARQV  
A. *oryzae* MTSDDRKMVPLLEEIVEALASIGIHLEQFHAESAPGQFEFIFLPPGSPIATVDTLIKARQV  
A. *nidulans* MTRETRRMLPLLEEIAETLASIGIHLQQFHAESAPGQFEFIFLPPDNPVAADVDTLIKSRQV  
A. *fumigatus* MTSDDRMLPLLEEIADTLTAIGIPLQFHSEAPGQFEFVLPNSPLPAVDTLKARQV  
\*\* .\*\*.\*.\*\*\*\*\* ..\*.\* \*\* \*.\*.\*.\*\*\*\*\*.\* \*\* \* .\*\*\*\*\*.\*.\*\*\*

A. *flavus* VTCVAEQHGLRATLHPRPLPHAAGSASHAHVSIAPPTQEDAFVLRHYPALAAFTLSQ  
A. *oryzae* VTCVAEQHGLRATLHPRPLPHAAGSASHAHVSIAPPTQEDAFVLRHYPALAAFTLSQ  
A. *nidulans* IANIVEKHGLRATLYPRPYPYSAAGTASHAHVSIAPSTKEESFLAGVLQHYPAVLAFTLSG  
A. *fumigatus* VANVAERHGLRATLHPRPLPNFAGTASHAHVSIAPSTNEDSFLAGVLAHFPAALLACTLAQ  
.. . \* .\*\*\*\*\* \*\*\* \* \*\* .\*\*\*\*\* . \* \* \* .\*\*\*\*\* . \* . \* . \* . \*

A. *flavus* DVSYDRVKSLWAGSEWVTWGTQONRETPIRKISPGHWEIKTLDGLANMYFAIAAFLSAGY  
A. *oryzae* DVSYDRVKSLWAGSEWVTWGTQONRETPIRKISPGHWEIKTLDGLANMYFAIAAFLSAGY  
A. *nidulans* DASYDRVKSGIWAGSEWVTWGTQONREAPIRKISPGHWEIKSLDGLANMYLAMAFLAAGY  
A. *fumigatus* ETSYDRVKSLWAGSEWVWGTQONREAPVRKIEPGHWELKSLDGLANMYVAMAFLGAGY  
. \*\*\*\*\* .\*\*\*\*\* .\*\*\*\*\* . \* .\*\* \* .\*\*\*\*\* . \* .\*\*\*\*\* \* .\*\*\*\*\* \*\*\*

A. *flavus* LGVKENLPLTVKDCIHDAAKLQAEREALGITTELPKSLTQSLDALEADSALQSIIGETV  
A. *oryzae* LGVKENLPLTVKDCIHDAAKLQAEREALGITTELPKSLTQSLDALEADSALQSIIGETV  
A. *nidulans* TGVKENLPLTIKDCPYDAASLPESERAALGITTKLPNTLAKSLAALESDEILRSLLGENL  
A. *fumigatus* LGLEHKIPLTVKDCLYDAATLTDAQREDLGITTRLPNTLAQSLDALES DHALQELLGPFL  
\* . .\*\*\*.\*\*\* \*\*\* \* ..\* \*\*\*\*\* \*\* .\*\*.\* \*\*.\* \* . .\*\* .

A. *flavus* VNNYTSVKRIESKRLLAMDETTRRTWLLERY  
A. *oryzae* VNNYTSVKRIESKRLLAMDETTRRTWLLERY  
A. *nidulans* VEDYIIVKRAESKKLSAMDEKARRKWLVERY  
A. *fumigatus* VRSYVIVKRAESKKLAAMGDEERRKWLIERY  
\* \* \*\*\* \*\* . \* \* \* . \*\* \* .\*\*\*
