# Supplementary material
Source: PubMed Central journal article supplement (PMC3485703)
Supplement: AEM.01241-12_zam999103771so3.pdf [file AEM.01241-12_zam999103771so3.pdf]

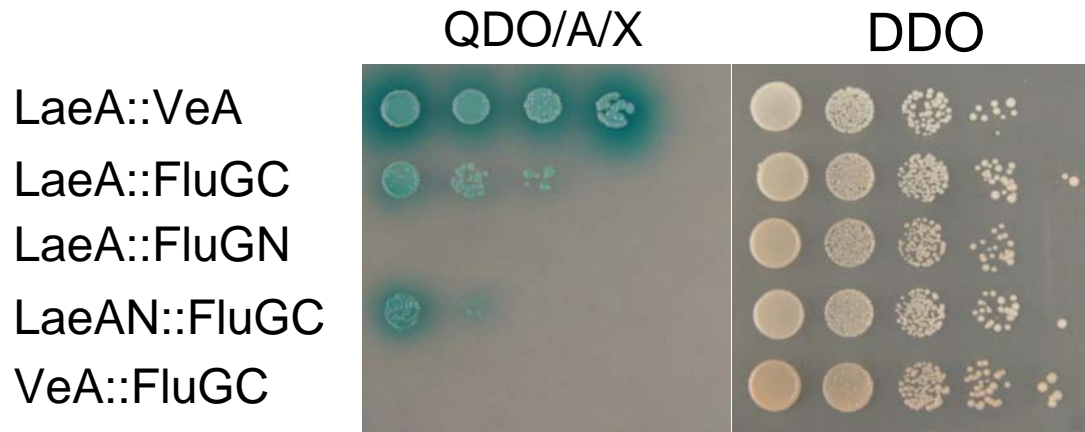

Figure S3. Yeast two-hybrid assays for assessing interaction of FluG and LaeA. LaeA and VeA interaction was used as the positive control. LaeAN: from a partial *laeA* cDNA clone encoding the amino-terminal 244 amino acids; FluGC: from a partial *fluG* cDNA clone encoding the GS domain (amino acids 504 to 863); FluGN: from a partial *fluG* cDNA clone encoding the amidohydrolase domain (amino acids 1 to 507). QDO/A/X is for testing three promoters (G1, G2, and M1) that control four reporter genes (*HIS3*, *ADE2*, *AUR1-C*, and *MEL1*). Ten-fold serial dilutions of yeast cells (20  $\mu$ l) were spotted on both media.
